# Supplementary material for: Net analyte signal-based simultaneous determination of dyes in environmental samples using moving window partial least squares regression with UV-vis spectroscopy
Source: Royal Society of Chemistry journal article supplement (doi:10.1039/b9ay00009g), 2009-01-01
Supplement: b9ay00009g.pdf [file b9ay00009g.pdf]

**Table 1**

PLS calibration and validation results for C.I. Disperse Blue 183 using the whole spectral region of original spectra (PLS), CSMWPLS, SCMWPLS and NAS pretreated spectra

|         | Spectral region (nm) | PLS component | RMSE (mg L <sup>-1</sup> ) |            |            |
|---------|----------------------|---------------|----------------------------|------------|------------|
|         |                      |               | Calibration                | Validation | Validation |
|         |                      |               | set                        | set 1      | set 2      |
| PLS     | 320-680              | 6             | 0.347                      | 0.325      | 0.330      |
| CSMWPLS | 455-468              | 4             | 0.469                      | 1.287      | 1.212      |
|         | 470-481              | 4             | 0.646                      | 1.813      | 1.726      |
|         | 546-567              | 3             | 0.948                      | 0.982      | 0.907      |
| SCMWPLS | 320-567              | 6             | 0.095                      | 0.601      | 0.567      |
| NAS     | 455-468              | 4             | 0.419                      | 1.319      | 1.318      |
|         | 470-481              | 4             | 0.603                      | 1.945      | 1.951      |
|         | 546-567              | 3             | 0.790                      | 1.420      | 1.420      |
|         | Combination          | 6             | 0.034                      | 0.229      | 0.229      |

**Table 2**

PLS calibration and validation results for C.I. Disperse Blue 79 using the whole spectral region of original spectra (PLS), CSMWPLS, SCMWPLS and NAS pretreated spectra

|         | Spectral region (nm) | PLS component | RMSE (mg L <sup>-1</sup> ) |                  |                  |
|---------|----------------------|---------------|----------------------------|------------------|------------------|
|         |                      |               | Calibration set            | Validation set 1 | Validation set 2 |
| PLS     | 320-680              | 6             | 1.280                      | 1.356            | 1.271            |
| CSMWPLS | 425-445              | 3             | 1.152                      | 1.374            | 1.275            |
|         | 542-557              | 3             | 0.882                      | 1.182            | 1.208            |
|         | 576-589              | 3             | 0.742                      | 2.101            | 2.012            |
|         | 618-648              | 3             | 1.280                      | 1.279            | 1.283            |
| SCMWPLS | 320-648              | 6             | 0.118                      | 1.342            | 1.262            |
| NAS     | 425-445              | 3             | 0.965                      | 1.557            | 1.559            |
|         | 542-557              | 3             | 0.719                      | 0.929            | 0.929            |
|         | 576-589              | 3             | 0.667                      | 1.413            | 1.414            |
|         | 618-648              | 3             | 0.953                      | 1.257            | 1.258            |
|         | Combination          |               | 6                          | 0.039            | 0.259            |

**Table 3**

PLS calibration and validation results for C.I. Disperse Red 82 using the whole spectral region of original spectra (PLS), CSMWPLS, SCMWPLS and NAS pretreated spectra

|         | Spectral<br>region (nm) | PLS<br>component | RMSE (mg L <sup>-1</sup> ) |            |            |
|---------|-------------------------|------------------|----------------------------|------------|------------|
|         |                         |                  | Calibration                | Validation | Validation |
|         |                         |                  | set                        | set 1      | set 2      |
| PLS     | 320-680                 | 6                | 0.997                      | 1.036      | 0.979      |
| SCMWPLS | 539-582                 | 7                | 0.058                      | 0.155      | 0.195      |
| NAS     | 539-582                 | 7                | 0.019                      | 0.108      | 0.108      |

**Table 4**

PLS calibration and validation results for C.I. Disperse Red 65 using the whole spectral region of original spectra (PLS), CSMWPLS, SCMWPLS and NAS pretreated spectra

|         | Spectral region (nm) | PLS component | RMSE (mg L <sup>-1</sup> ) |            |            |
|---------|----------------------|---------------|----------------------------|------------|------------|
|         |                      |               | Calibration                | Validation | Validation |
|         |                      |               | set                        | set 1      | set 2      |
| PLS     | 320-680              | 6             | 0.150                      | 0.148      | 0.162      |
| CSMWPLS | 491-498              | 3             | 1.038                      | 1.040      | 1.028      |
|         | 534-546              | 4             | 0.970                      | 0.961      | 0.981      |
|         | 573-585              | 3             | 0.836                      | 0.829      | 0.861      |
| SCMWPLS | 320-585              | 5             | 0.458                      | 0.462      | 0.459      |
| NAS     | 491-498              | 3             | 0.984                      | 1.000      | 1.000      |
|         | 534-546              | 4             | 0.908                      | 0.919      | 0.918      |
|         | 573-585              | 3             | 0.748                      | 0.811      | 0.811      |
|         | Combination          | 5             | 0.131                      | 0.436      | 0.436      |

**Table 5**

PLS calibration and validation results for C.I. Disperse Orange 25 using the whole spectral region of original spectra (PLS), CSMWPLS, SCMWPLS and NAS pretreated spectra

|         | Spectral region<br>(nm) | PLS<br>component | RMSE (mg L <sup>-1</sup> ) |                     |                     |
|---------|-------------------------|------------------|----------------------------|---------------------|---------------------|
|         |                         |                  | Calibration<br>set         | Validation<br>set 1 | Validation set<br>2 |
| PLS     | 320-680                 | 6                | 1.119                      | 1.210               | 1.107               |
| SCMWPLS | 320-390                 | 5                | 0.201                      | 0.473               | 0.430               |
| NAS     | 320-390                 | 5                | 0.020                      | 0.205               | 0.246               |

**Table 6**

PLS calibration and validation results for C.I. Disperse Yellow 211 using the whole spectral region of original spectra (PLS), CSMWPLS, SCMWPLS and NAS pretreated spectra

|         | Spectral<br>region (nm) | PLS<br>component | RMSE (mg L <sup>-1</sup> ) |            |            |
|---------|-------------------------|------------------|----------------------------|------------|------------|
|         |                         |                  | Calibration                | Validation | Validation |
|         |                         |                  | set                        | set 1      | set 2      |
| PLS     | 320-680                 | 6                | 0.171                      | 0.161      | 0.162      |
| SCMWPLS | 494-514                 | 5                | 0.060                      | 0.429      | 0.414      |
| NAS     | 494-514                 | 5                | 0.058                      | 0.177      | 0.177      |

**Table 7**

Determination of dyes in waste water using NAS-PLS and univariate calibration

| Dyes                | Spectral region (nm) | Added (mg L <sup>-1</sup> ) | NAS-PLS found (mg L <sup>-1</sup> ) | Univariate calibration found (mg L <sup>-1</sup> ) |
|---------------------|----------------------|-----------------------------|-------------------------------------|----------------------------------------------------|
| Disperse Blue 183   | combination          | 1.50                        | 1.52                                | 1.55                                               |
| Disperse Blue 79    | combination          | 2.00                        | 1.95                                | 2.06                                               |
| Disperse Red 82     | 539-582              | 3.00                        | 3.60                                | 2.55                                               |
| Disperse Red 65     | combination          | 1.50                        | 1.50                                | 1.56                                               |
| Disperse Orange 25  | 320-390              | 4.00                        | 3.92                                | 2.56                                               |
| Disperse Yellow 211 | 494-514              | 2.50                        | 2.45                                | 2.63                                               |
